# Supplementary material for: Synthesis and antifouling performance of tadpole-shaped poly(N-hydroxyethylacrylamide) coatings
Source: Royal Society of Chemistry journal article supplement (doi:10.1039/d0tb03015e), 2021-01-01
Supplement: d0tb03015e1.pdf [file d0tb03015e1.pdf]

Electronic supplementary information for:  
Synthesis and antifouling performance of tadpole-shaped  
poly(*N*-hydroxyethylacrylamide) coatings

Yanping Cao, Shengjie Liu, Zhaoqiang Wu\* and Hong Chen

College of Chemistry, Chemical Engineering and Materials Science, Soochow University, Suzhou  
215123, P. R. China

E-mail: wzqwhu@suda.edu.cn (Z. Wu)

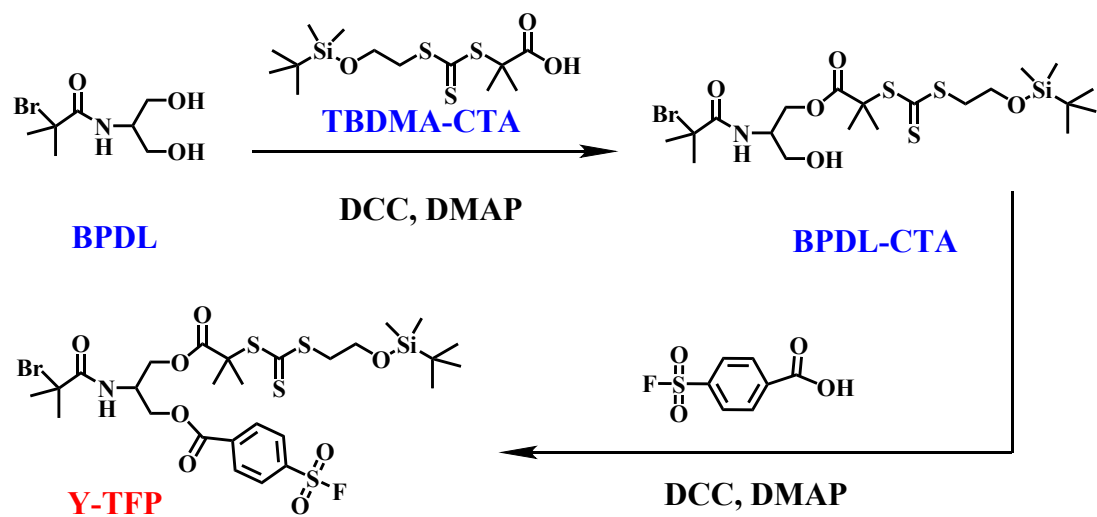

**Scheme S1.** Synthesis of Y-TFP.

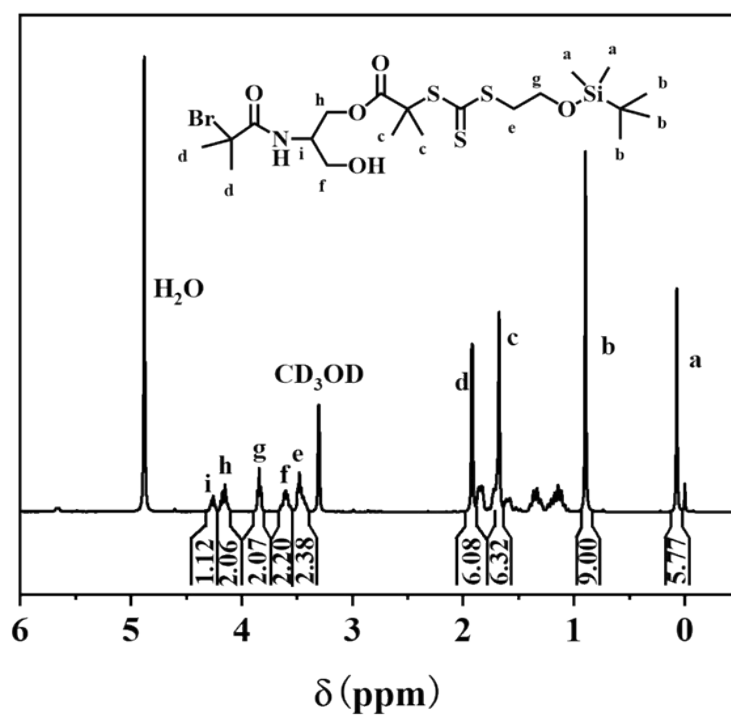

**Figure S1.**  $^1\text{H}$  NMR spectrum of BPDL-CTA in  $\text{CD}_3\text{OD}$ .

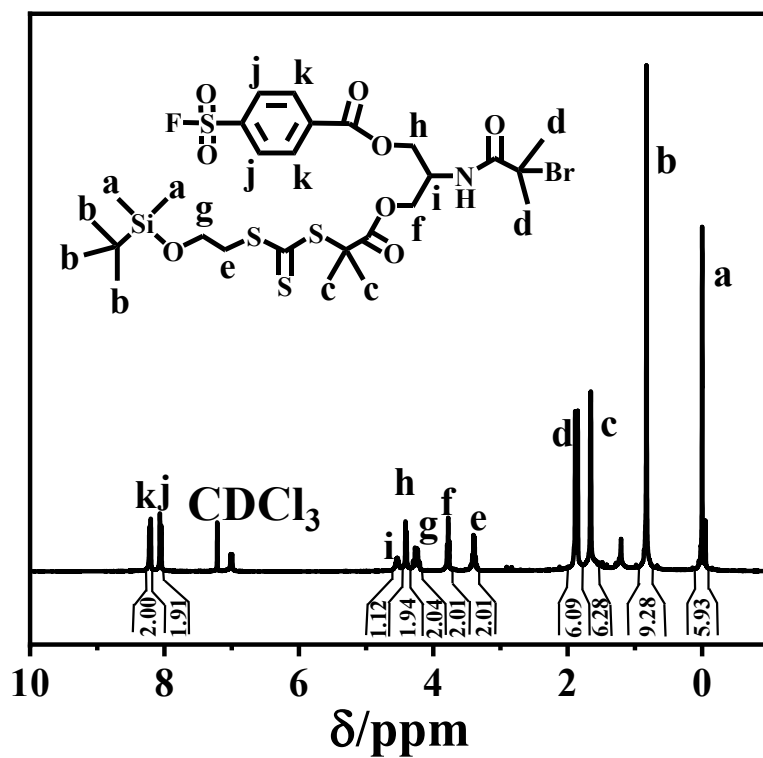

Figure S2. <sup>1</sup>H NMR spectrum of Y-TFP in CDCl<sub>3</sub>.

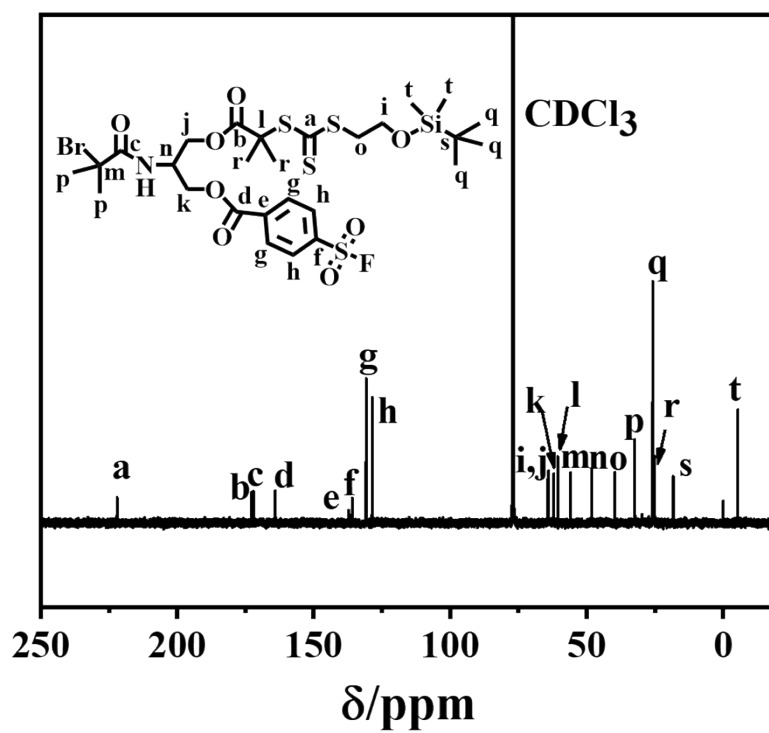

Figure S3. <sup>13</sup>C NMR spectrum of Y-TFP in CDCl<sub>3</sub>.

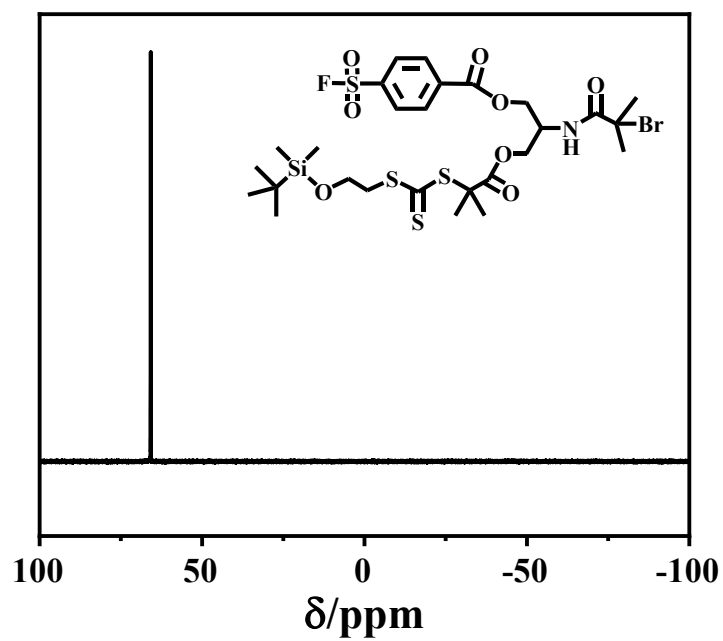

Figure S4.  $^{19}\text{F}$  NMR spectrum of Y-TFP in  $\text{CDCl}_3$ .

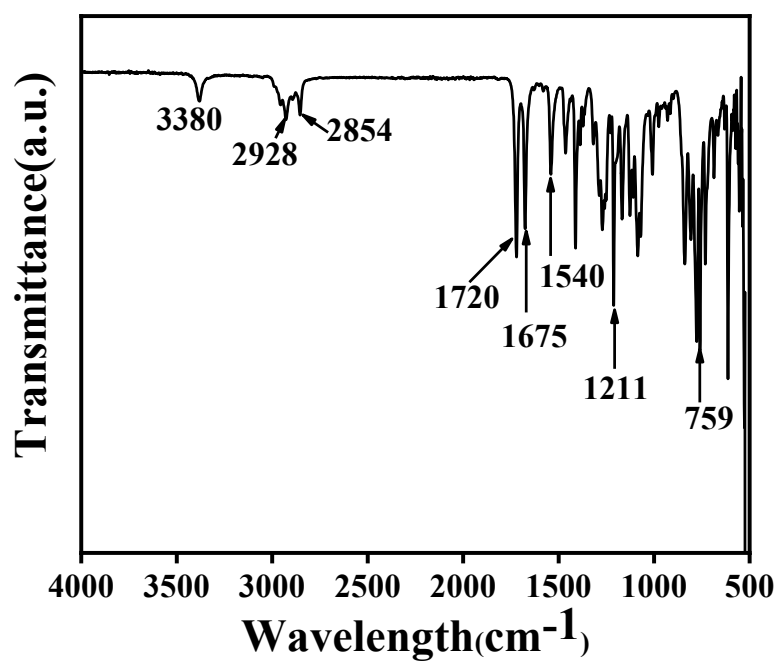

Figure S5. FT-IR spectrum of Y-TFP.

## Display Report

### Analysis Info

Analysis Name D:\Data\zyw\stu-sam\20180116\XZM\_GD7\_01\_8454.d  
Method 0919-MS-low-METHODS.m  
Sample Name XZM  
Comment

Acquisition Date 4/12/2019 3:25:27 PM

Operator bruker  
Instrument micrOTOF-Q III 8228888.20487

### Acquisition Parameter

|             |            |                       |           |                  |           |
|-------------|------------|-----------------------|-----------|------------------|-----------|
| Source Type | ESI        | Ion Polarity          | Positive  | Set Nebulizer    | 1.0 Bar   |
| Focus       | Not active | Set Capillary         | 4500 V    | Set Dry Heater   | 180 °C    |
| Scan Begin  | 50 m/z     | Set End Plate Offset  | -500 V    | Set Dry Gas      | 4.0 l/min |
| Scan End    | 3000 m/z   | Set Collision Cell RF | 200.0 Vpp | Set Divert Valve | Waste     |

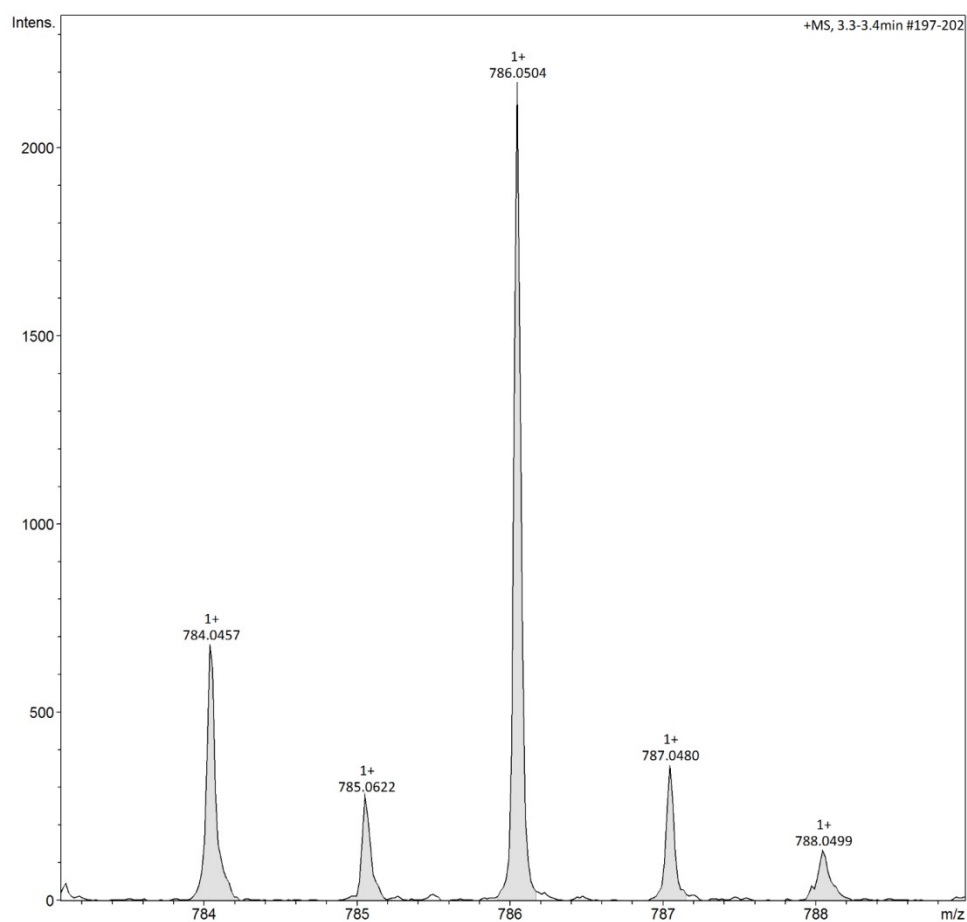

**Figure S6.** Mass spectrum of Y-TFP.

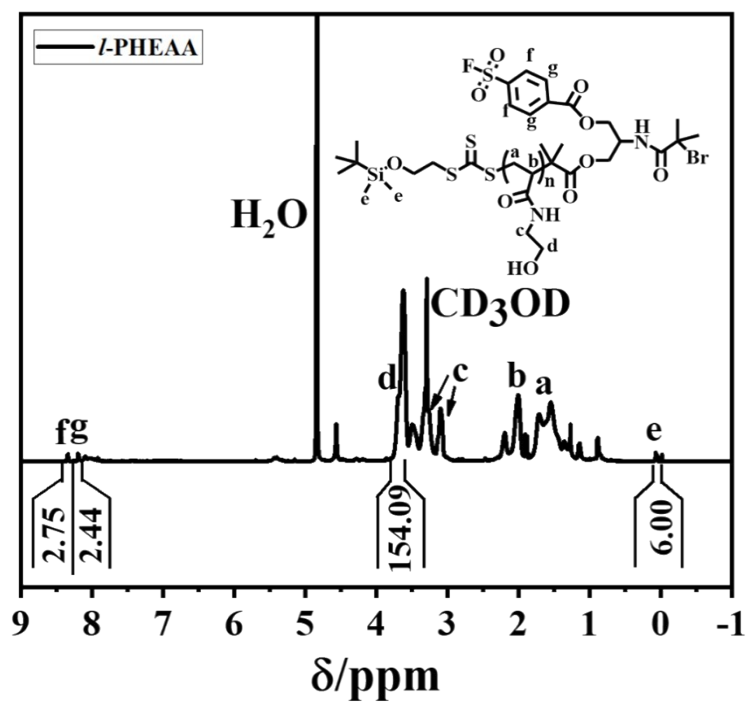

Figure S7.  $^1\text{H}$  NMR spectrum of PHEAA in  $\text{CD}_3\text{OD}$ .

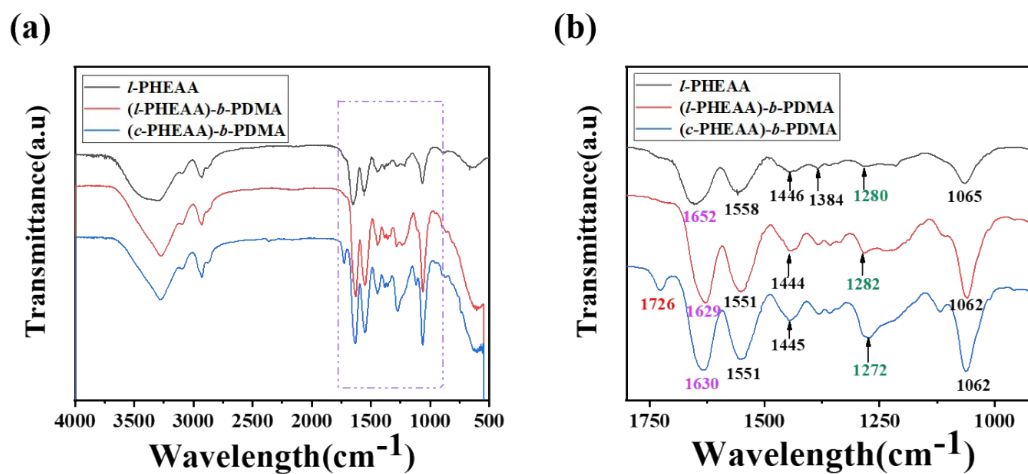

Figure S8. FT-IR spectra of (*l*-PHEAA)-*b*-PDMA and the resultant (*c*-PHEAA)-*b*-PDMA. (a) Full FT-IR spectra; (b) Expanded FT-IR spectra.

**Table S1.** Molecular characterizations of the synthesized polymers

| polymer                            | $M_{n,NMR}^a$ (g/mol) | $M_{n,GPC}^b$ (g/mol) | Dispersity ( $\mathcal{D}$ ) <sup>b</sup> |
|------------------------------------|-----------------------|-----------------------|-------------------------------------------|
| PHEAA                              | 9600                  | 3500                  | 1.23                                      |
| ( <i>l</i> -PHEAA)- <i>b</i> -PDMA | 11500                 | 5700                  | 1.61                                      |
| ( <i>c</i> -PHEAA)- <i>b</i> -PDMA | /                     | 5400                  | 1.47                                      |

<sup>a</sup>The  $M_n$  was determined *via* <sup>1</sup>H NMR spectroscopy in CD<sub>3</sub>OD. <sup>b</sup>The  $M_n$  and  $\mathcal{D}$  ( $M_w/M_n$ ) were measured by GPC with PEG standards using H<sub>2</sub>O as eluent.

**Table S2.** Surface characteristics of polymer-modified gold surfaces

| Sample                                | Thickness[nm] | Water contact angle[°] | Surface roughness[nm] |
|---------------------------------------|---------------|------------------------|-----------------------|
| Au                                    | /             | 84 ± 2                 | 4.14                  |
| Au-( <i>l</i> -PHEAA)- <i>b</i> -PDMA | 9.4 ± 0.3     | 19 ± 2                 | 4.39                  |
| Au-( <i>c</i> -PHEAA)- <i>b</i> -PDMA | 2.1 ± 0.1     | 30 ± 2                 | 3.82                  |

AFM was used to measure the root-mean-square (RMS) surface roughness. For the dry thickness of coating determined by ellipsometry, all samples are tested at room temperature and the measurement angle is 70°. Each sample is tested at two different points, and the data is then analyzed by WVASE32TM data acquisition and analysis software.
